# Supplementary material for: Reprogramming Mycobacterium tuberculosis CRISPR System for Gene Editing and Genome-wide RNA Interference Screening
Source: PubMed Central journal article supplement (PMC10225669; doi:10.1016/j.gpb.2021.01.008), 2021-12-16

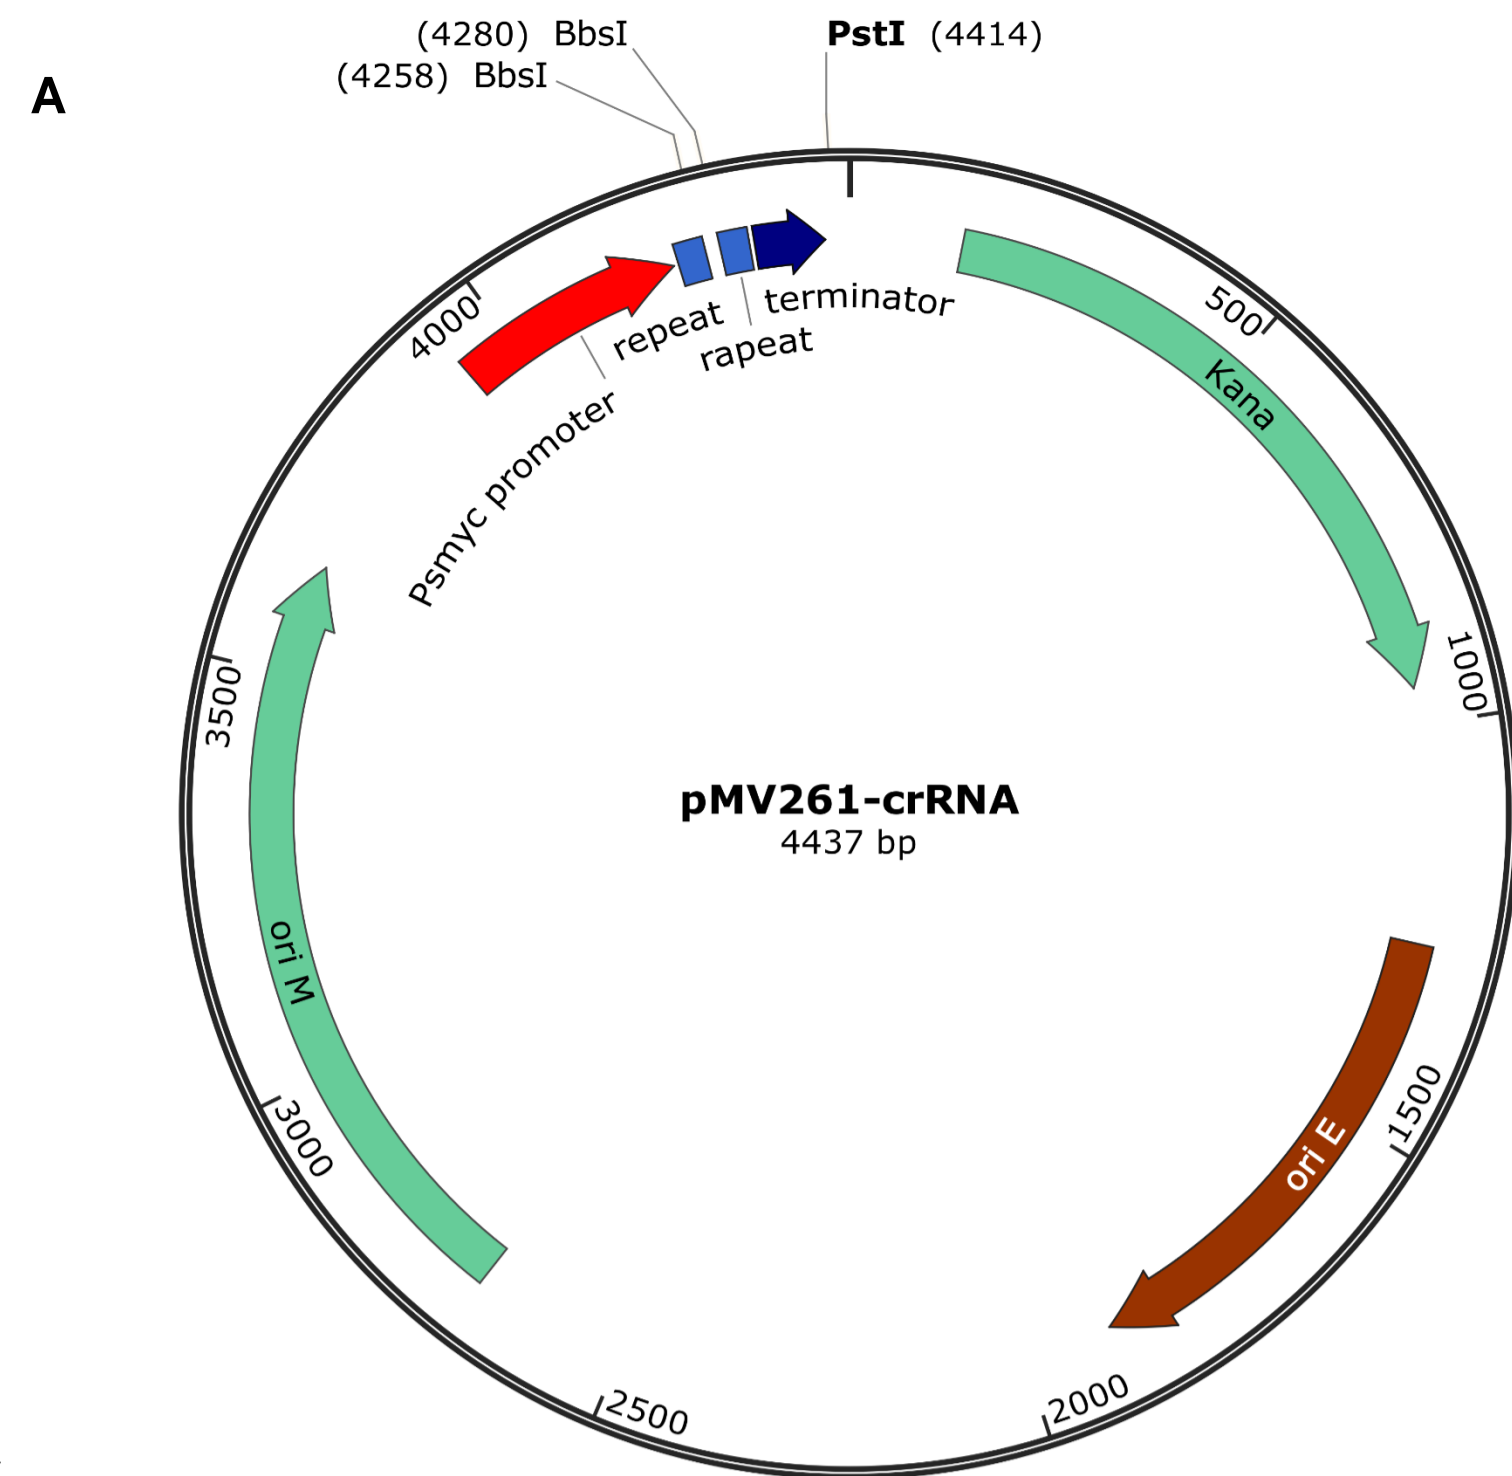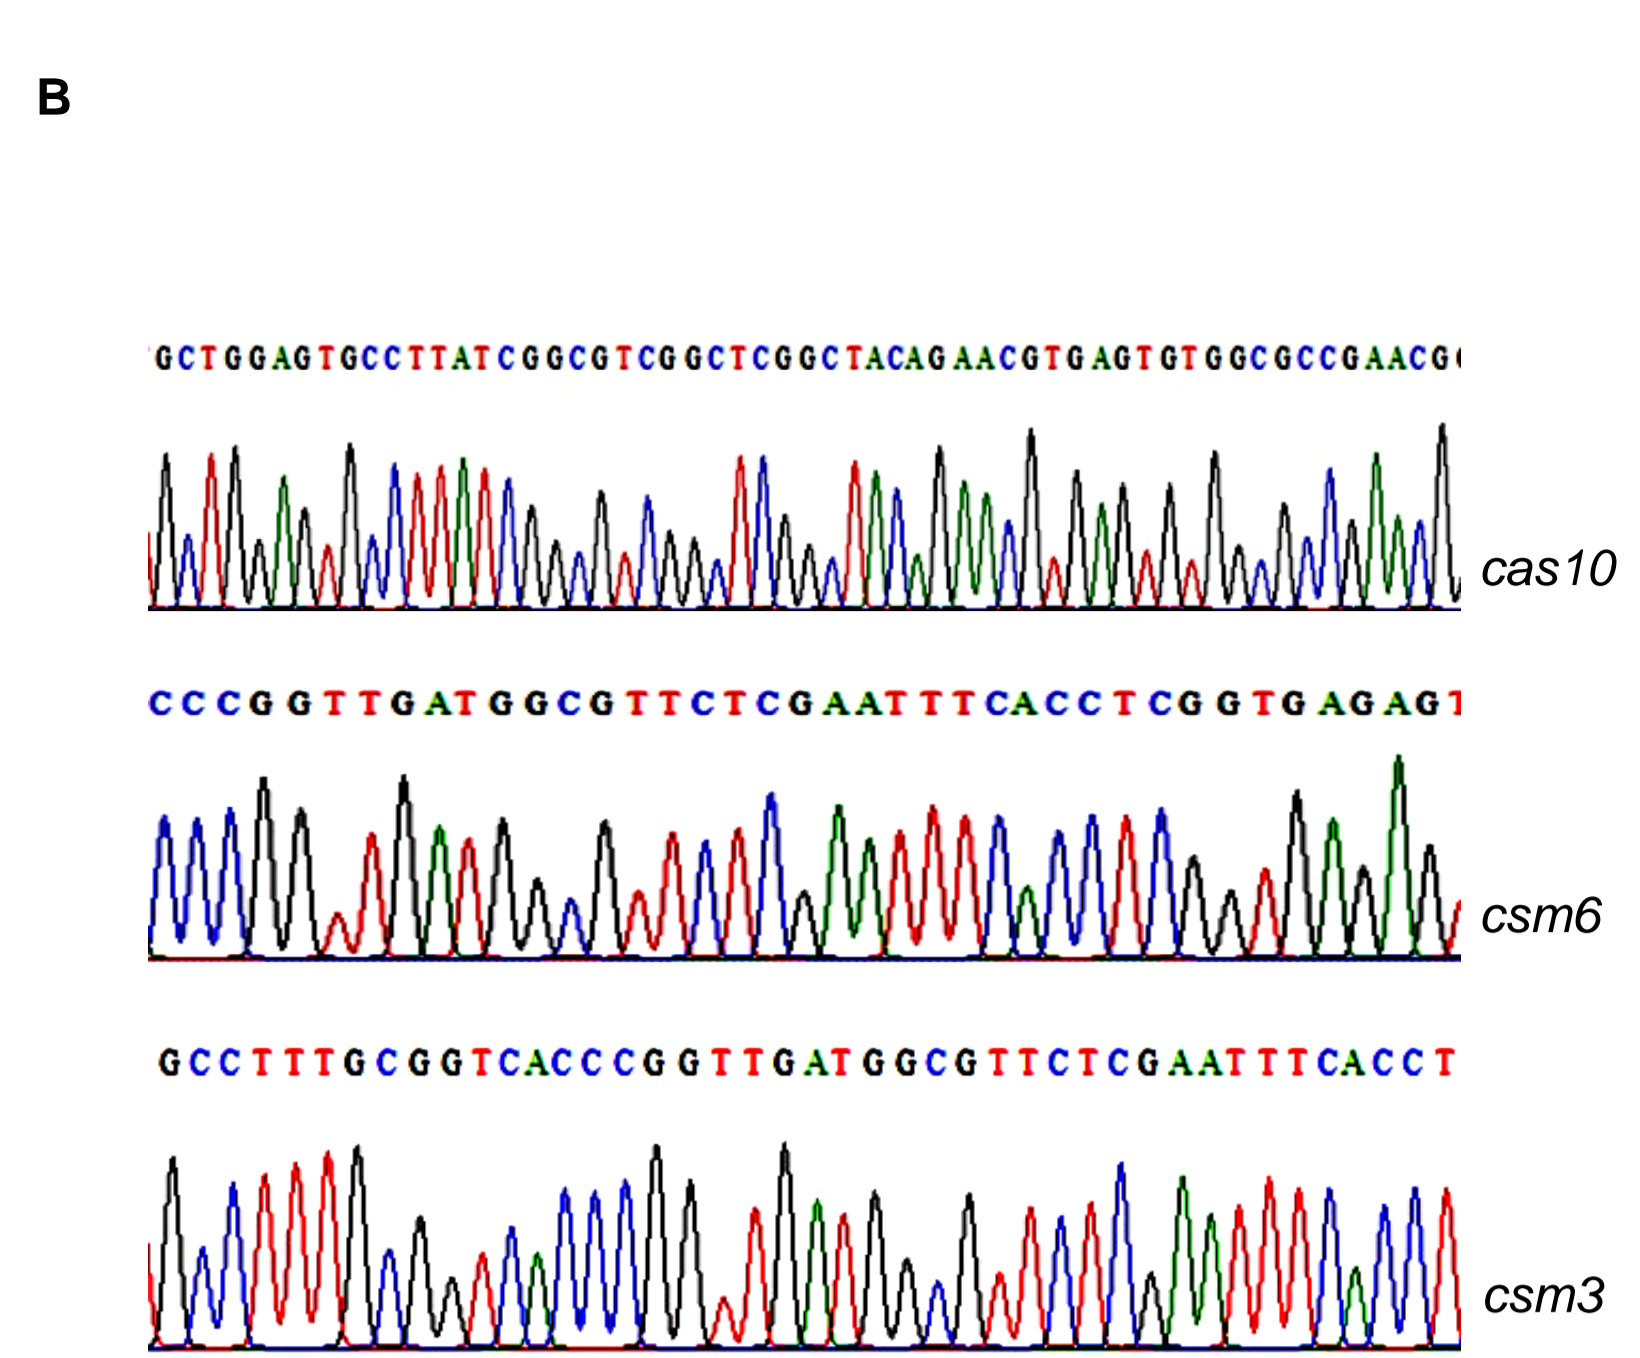

**C**

GGATCGTCGGCACCGTCACGGCCGTGGGAGGCGGCA  
CGATCCGCGACGTGATGATCGGCCGCATCCCCACGGT  
GCTGCGCAGTGAGCTCTACGCCATCCCGGCGTTGATC  
TGTGCGTTCGCACGCACAGGCCCGGTGTGAGAAGGG  
TCTGTGACGAGCGGGAGAACCACCCGGGGTGGGCG  
AGTTTGTCTGCGTGTGCTCGGTGAGTAGGCTCTGG  
GAGTACCCGTGTGTACGACCAGCACGGCATAATCAT  
TTCGACGCCGAGAGATTCGCCGCCGAATCTAGAGTC  
GTCAGACCCAAAACCCCGAGAGGGGACGGAAACGTC  
TGGTCTGCGCCGTTGGCGTCCACGGCATTATCGTCGC  
GACCCAAAACCCCGAGAGGGGACGGAAACTTCCAGG  
CATCAAATAAAACGAAAGGCTCAGTCGAAAGACTGGG  
CCTTTCGTTTTATCTGTTGTTTGTGCGGTGAACGCTCTCT  
TTTTT

■ Psmyc promoter ■ Repeats ■ gRNA ■ Terminator

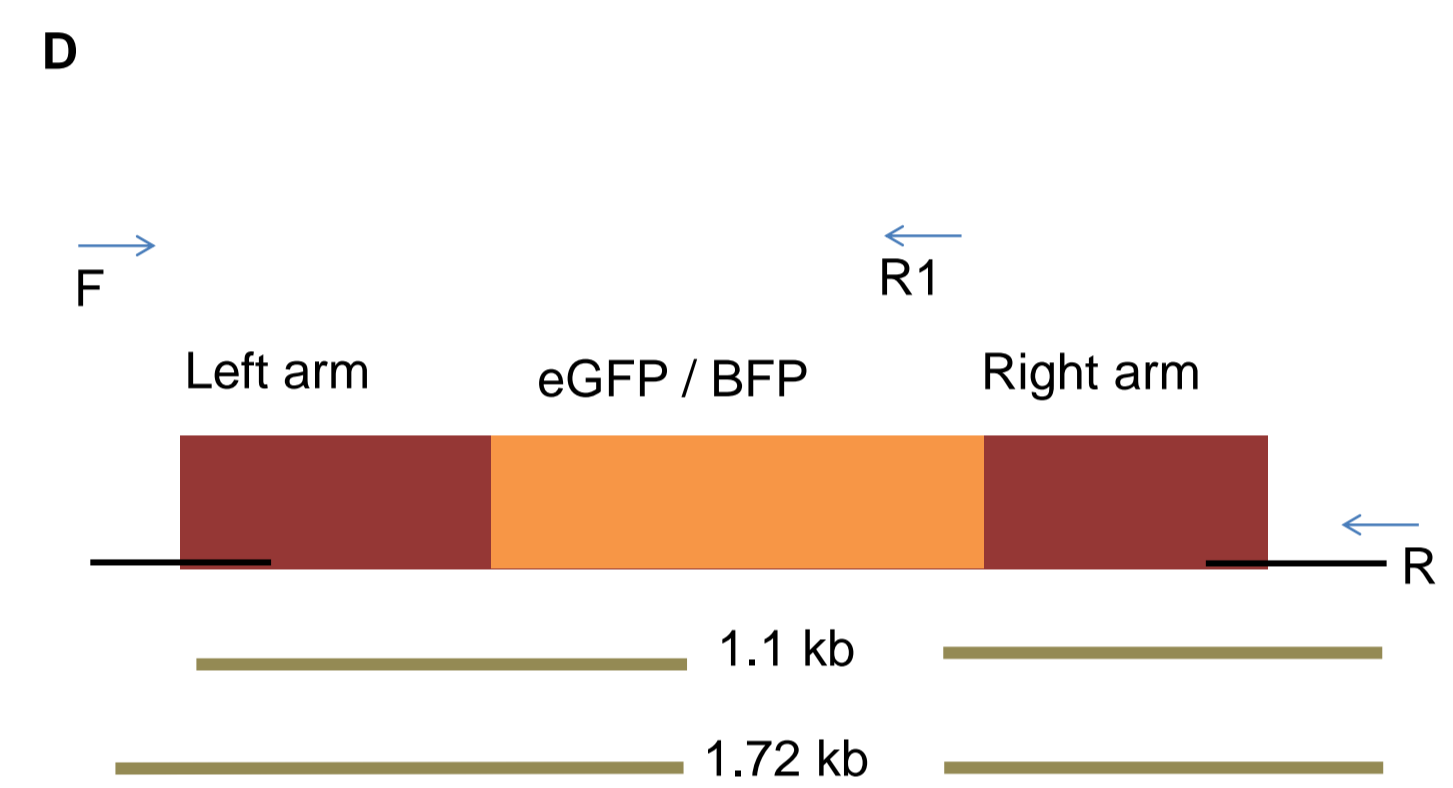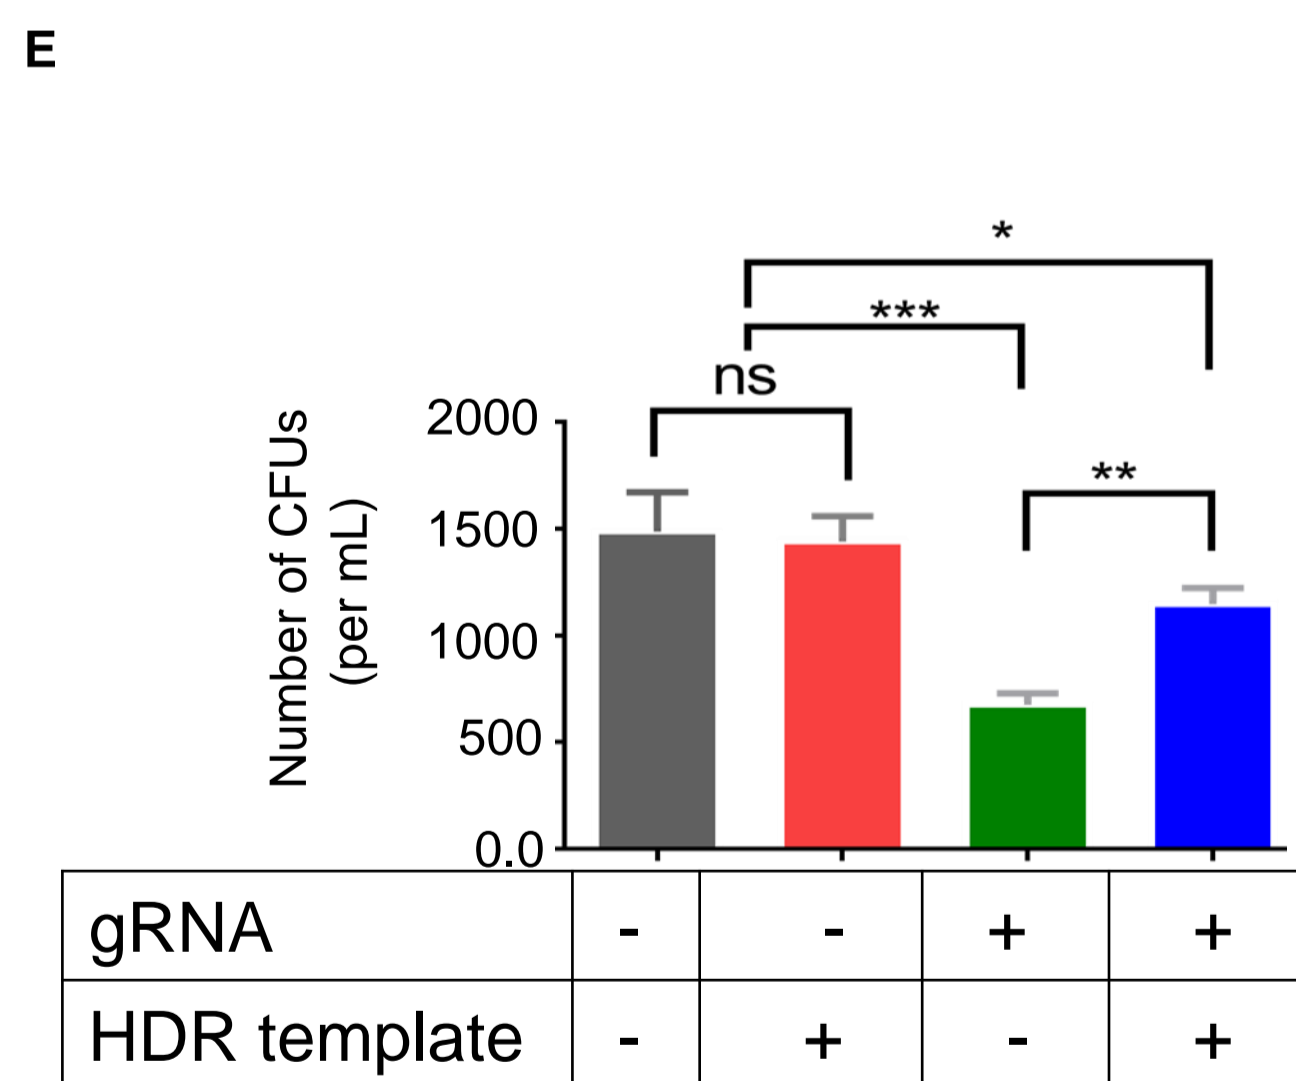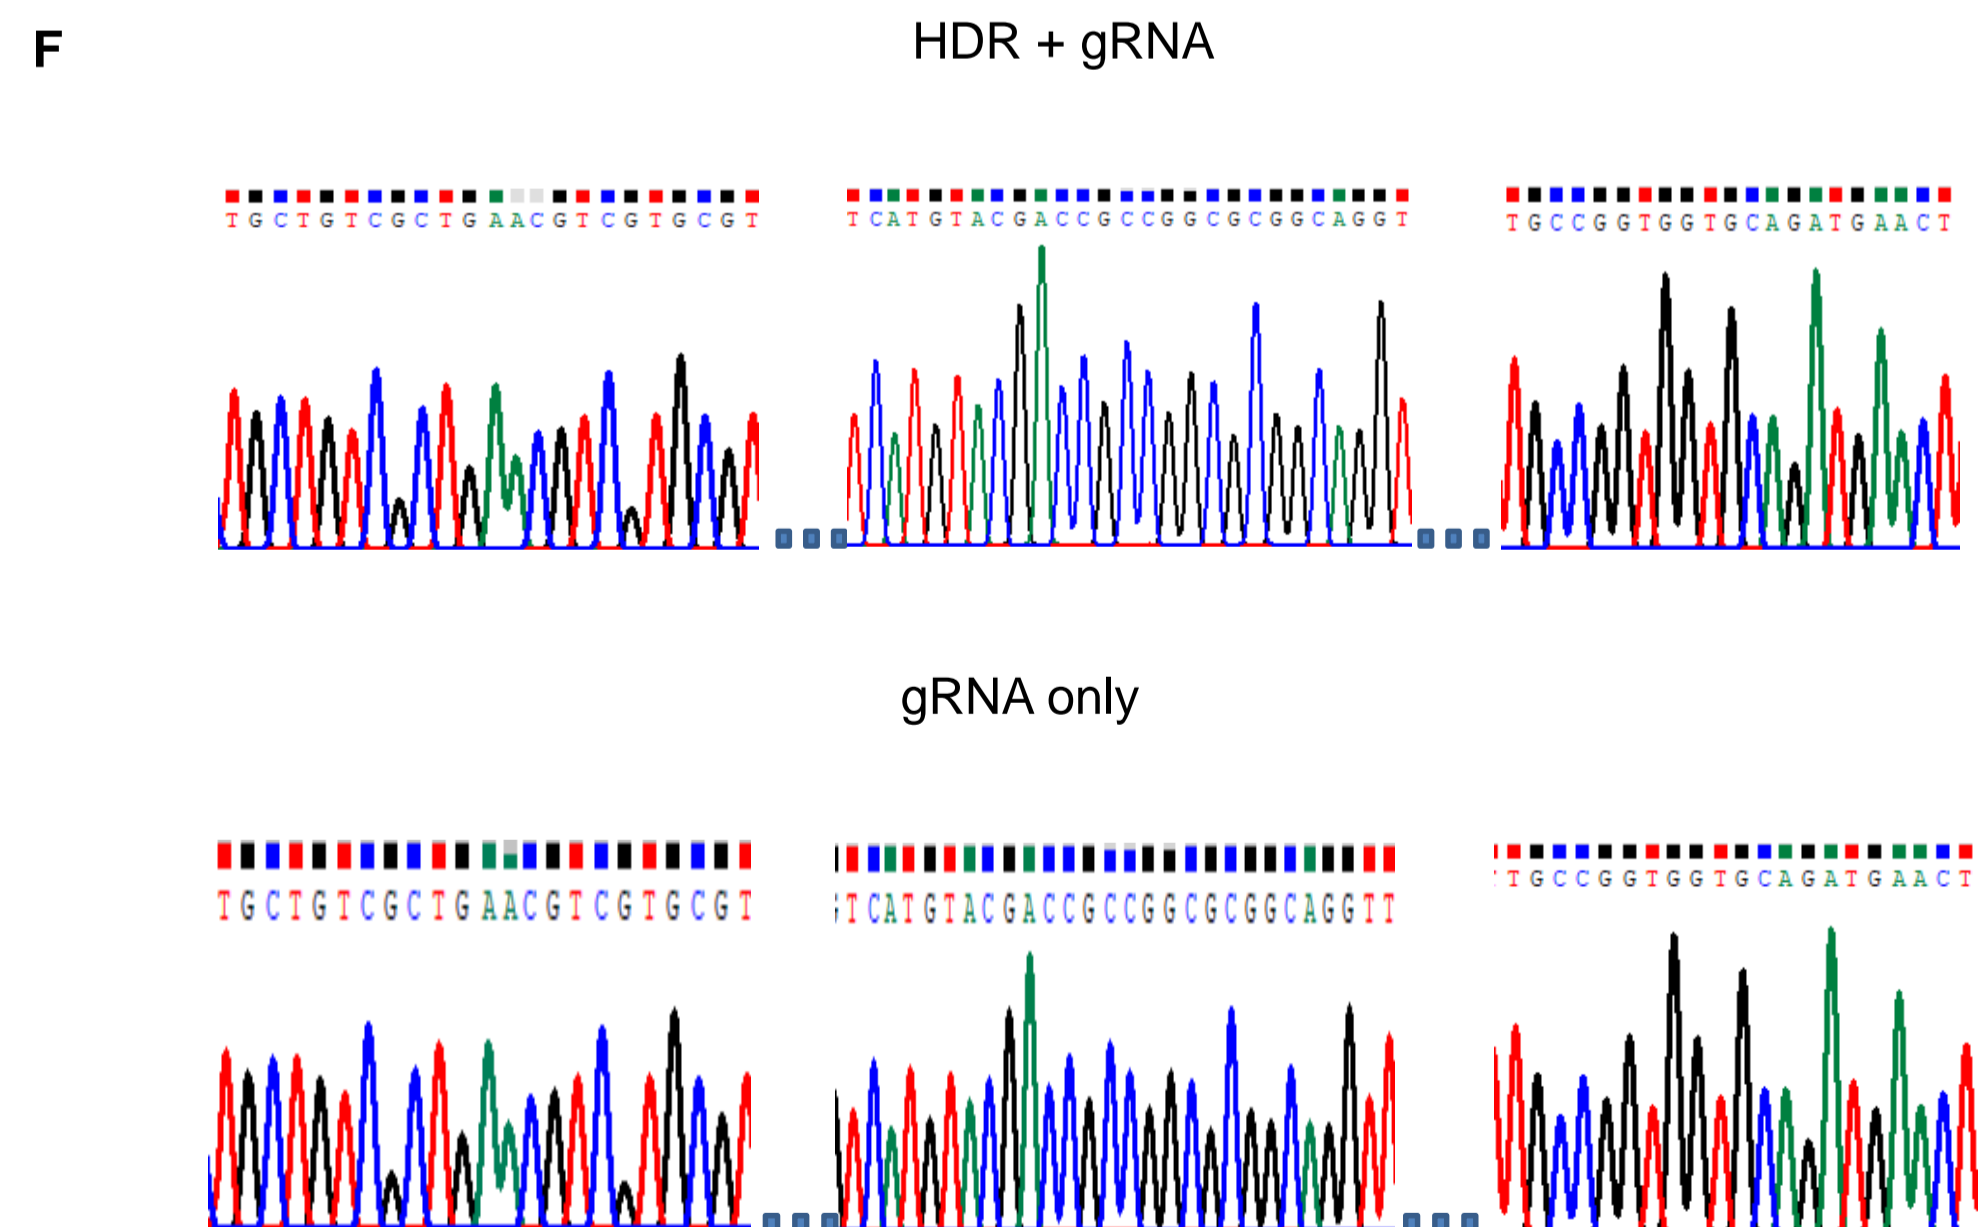

Supplement: mmc1.pdf [file mmc1.pdf]
