# Supplementary material for: Reprogramming Mycobacterium tuberculosis CRISPR System for Gene Editing and Genome-wide RNA Interference Screening
Source: PubMed Central journal article supplement (PMC10225669; doi:10.1016/j.gpb.2021.01.008), 2021-12-16

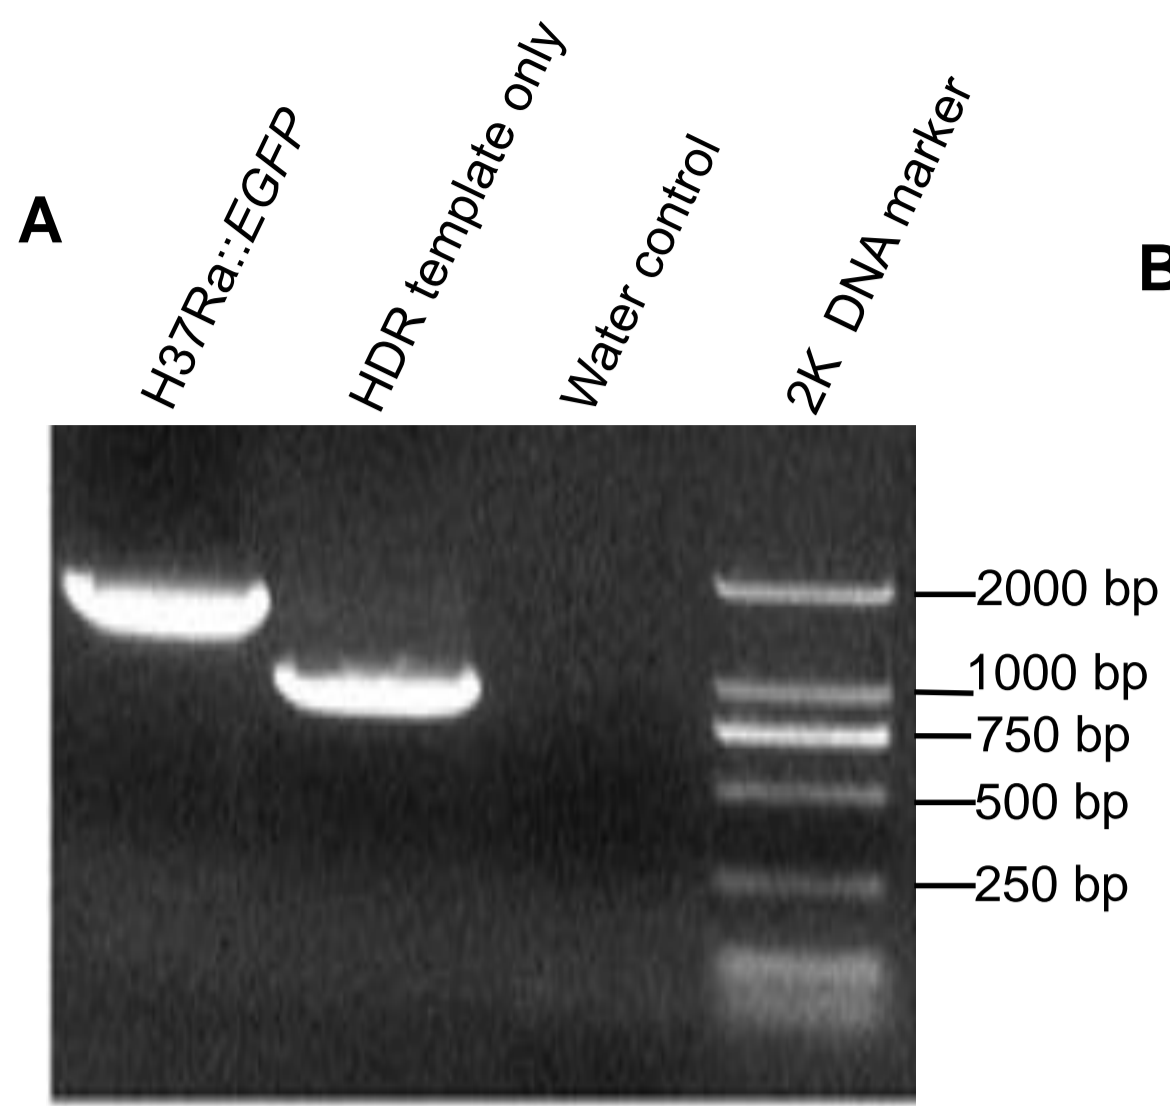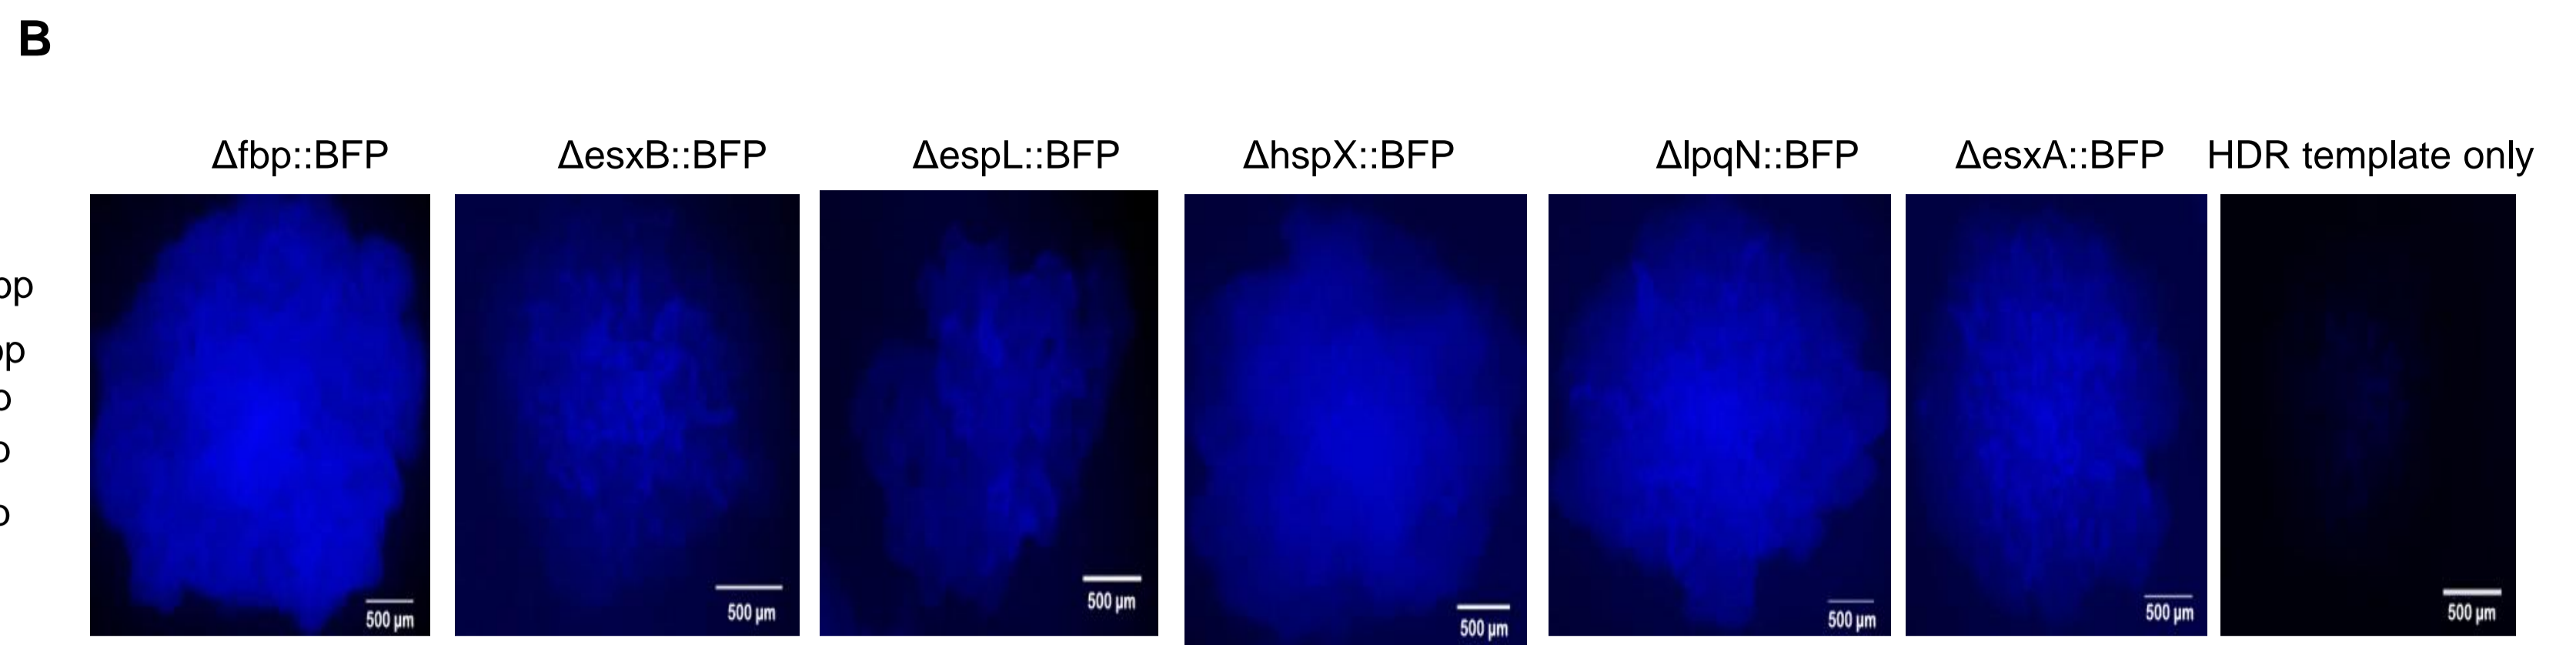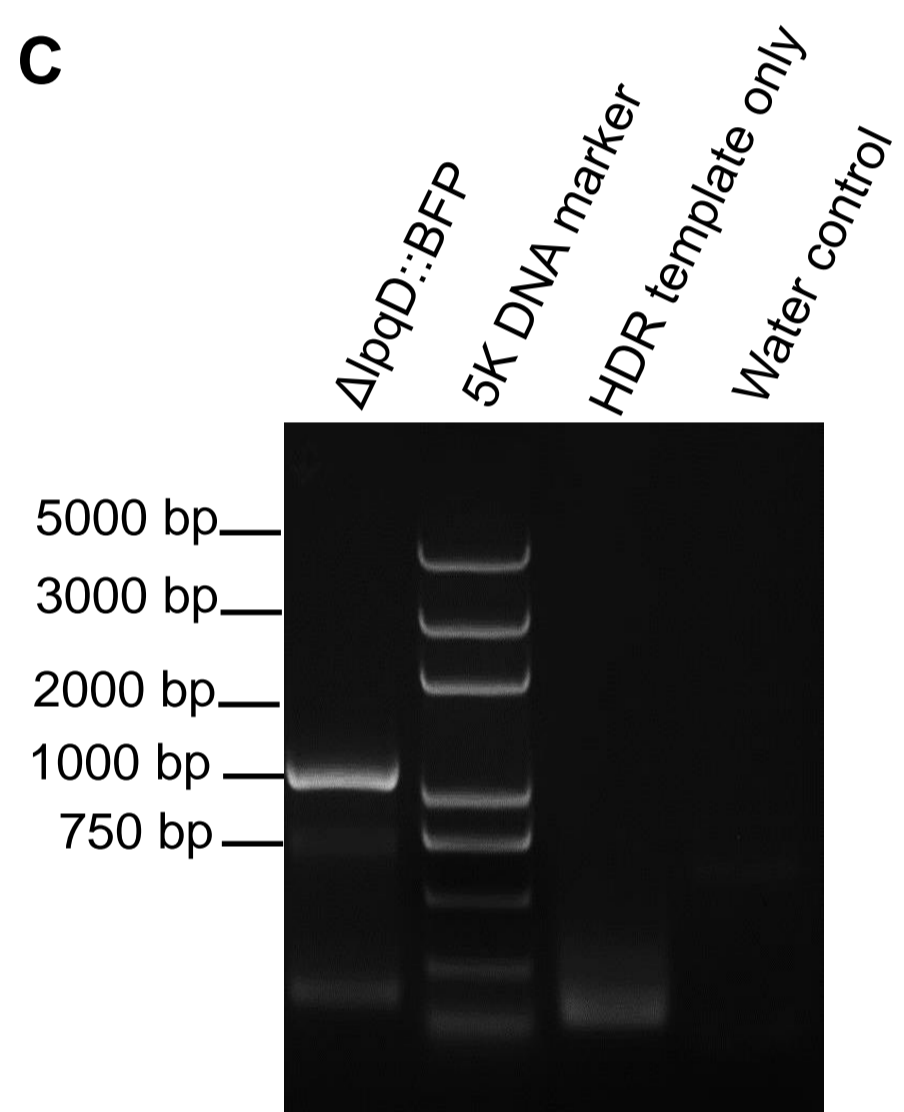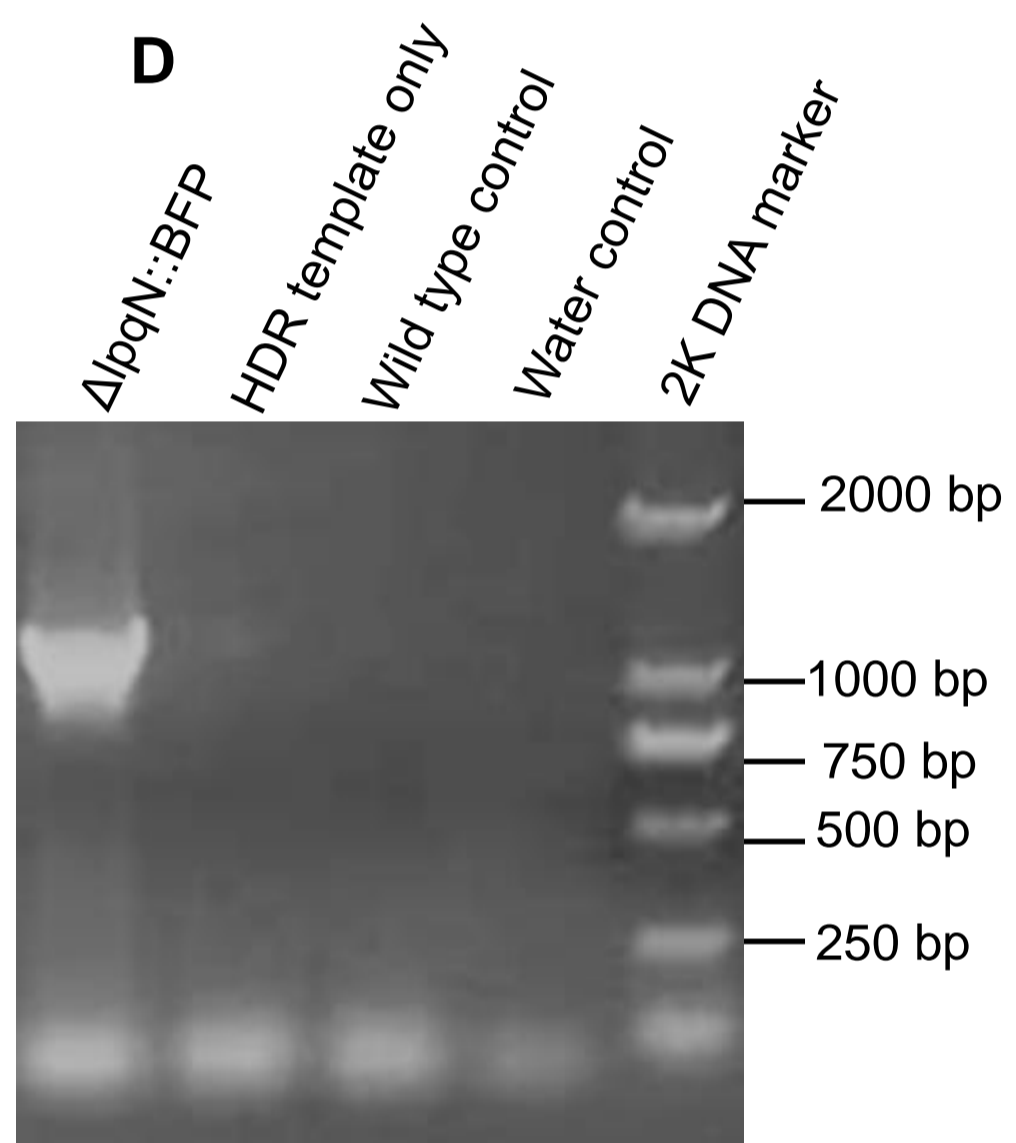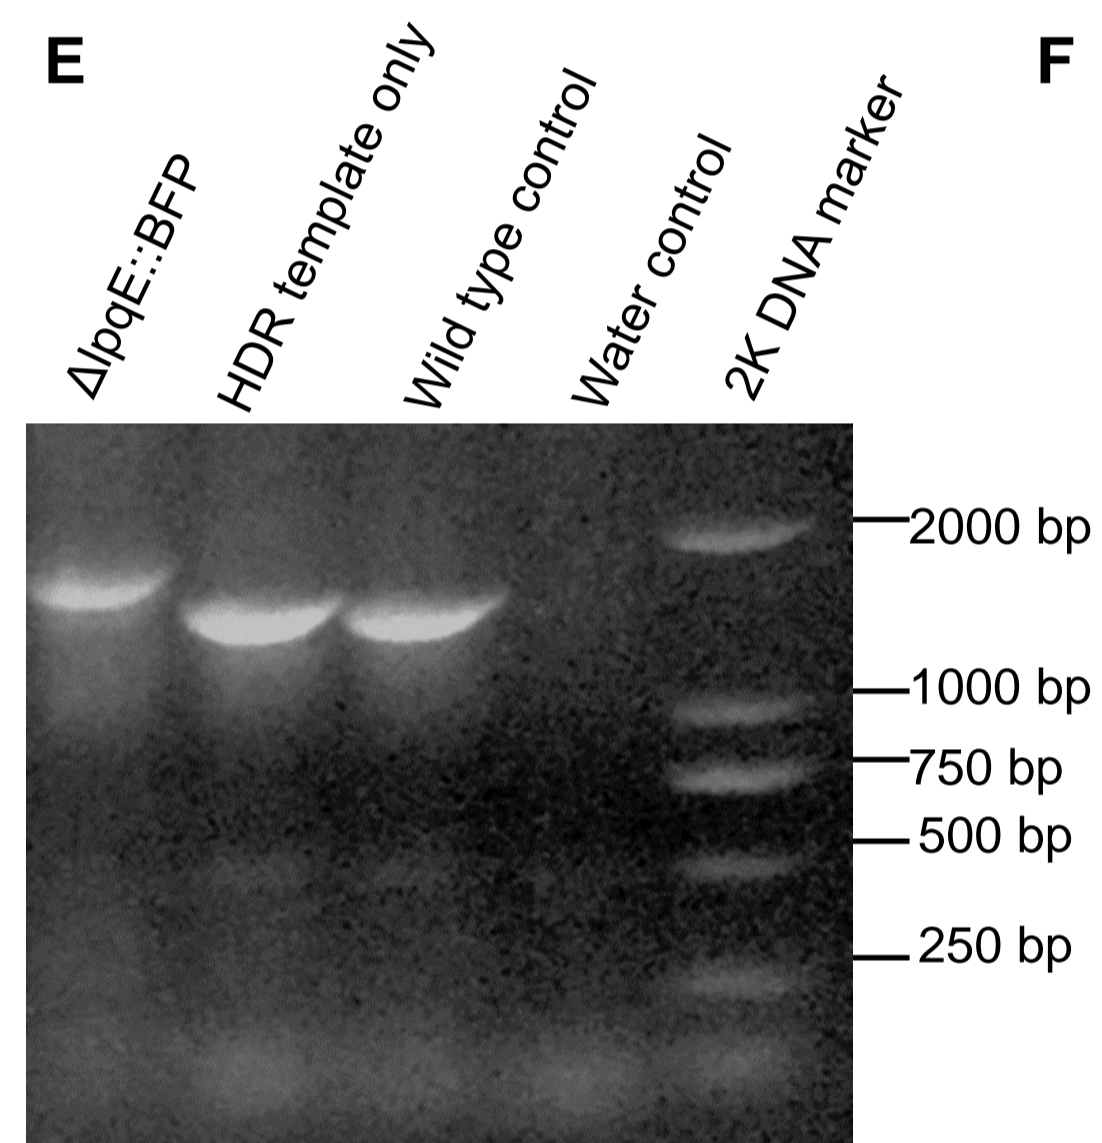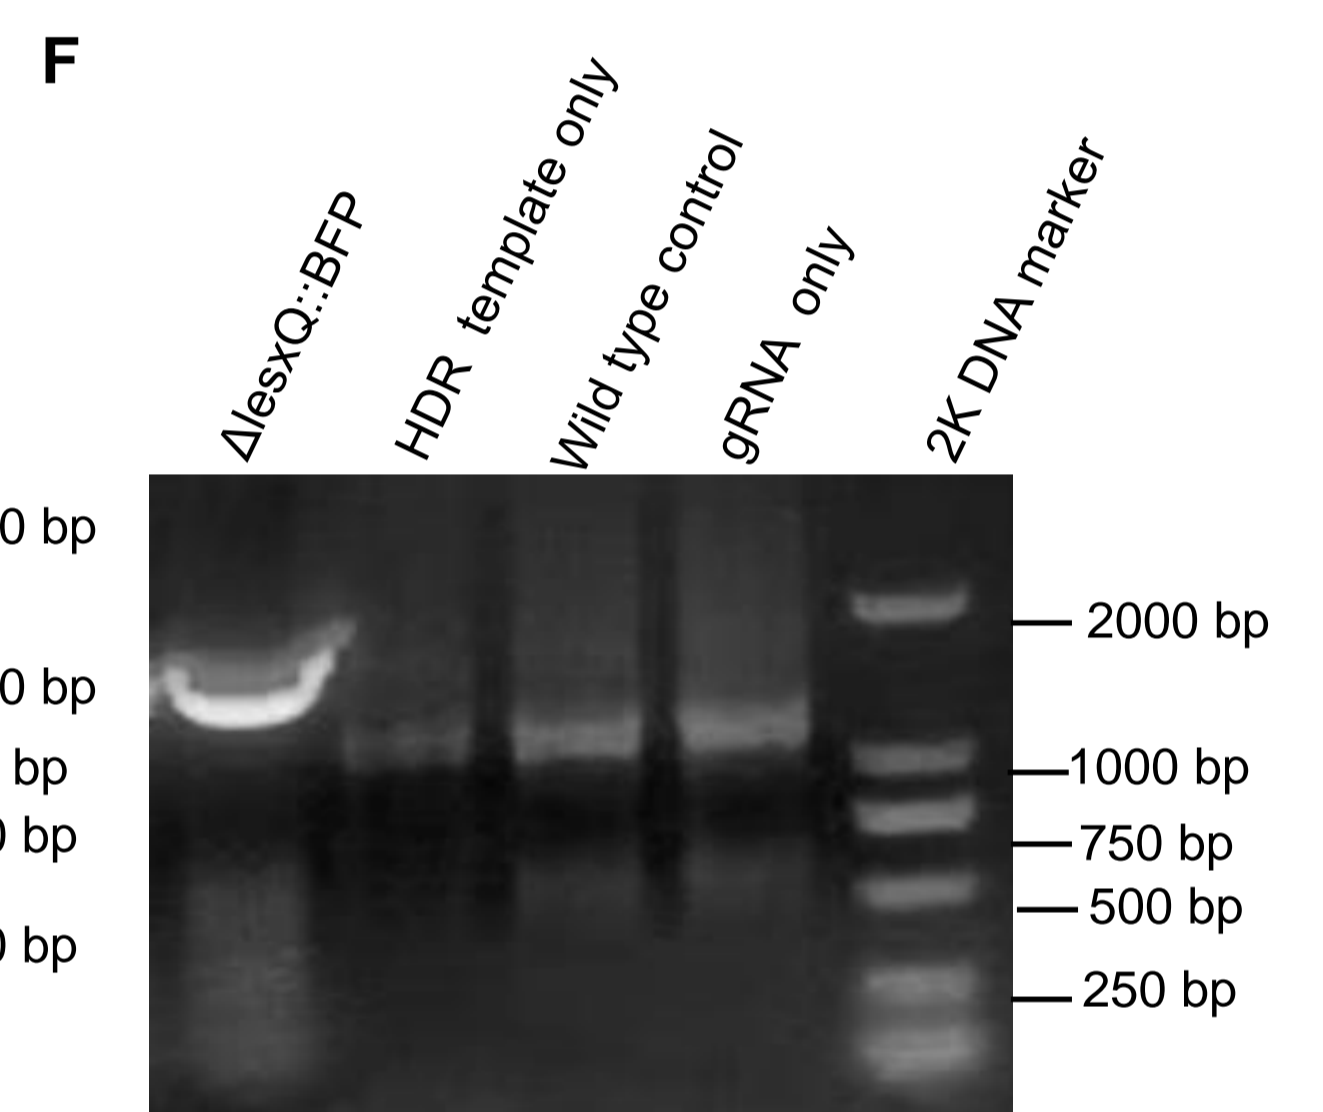

Supplement: mmc2.pdf [file mmc2.pdf]
