# Supplementary material for: Reprogramming Mycobacterium tuberculosis CRISPR System for Gene Editing and Genome-wide RNA Interference Screening
Source: PubMed Central journal article supplement (PMC10225669; doi:10.1016/j.gpb.2021.01.008), 2021-12-16

**A**

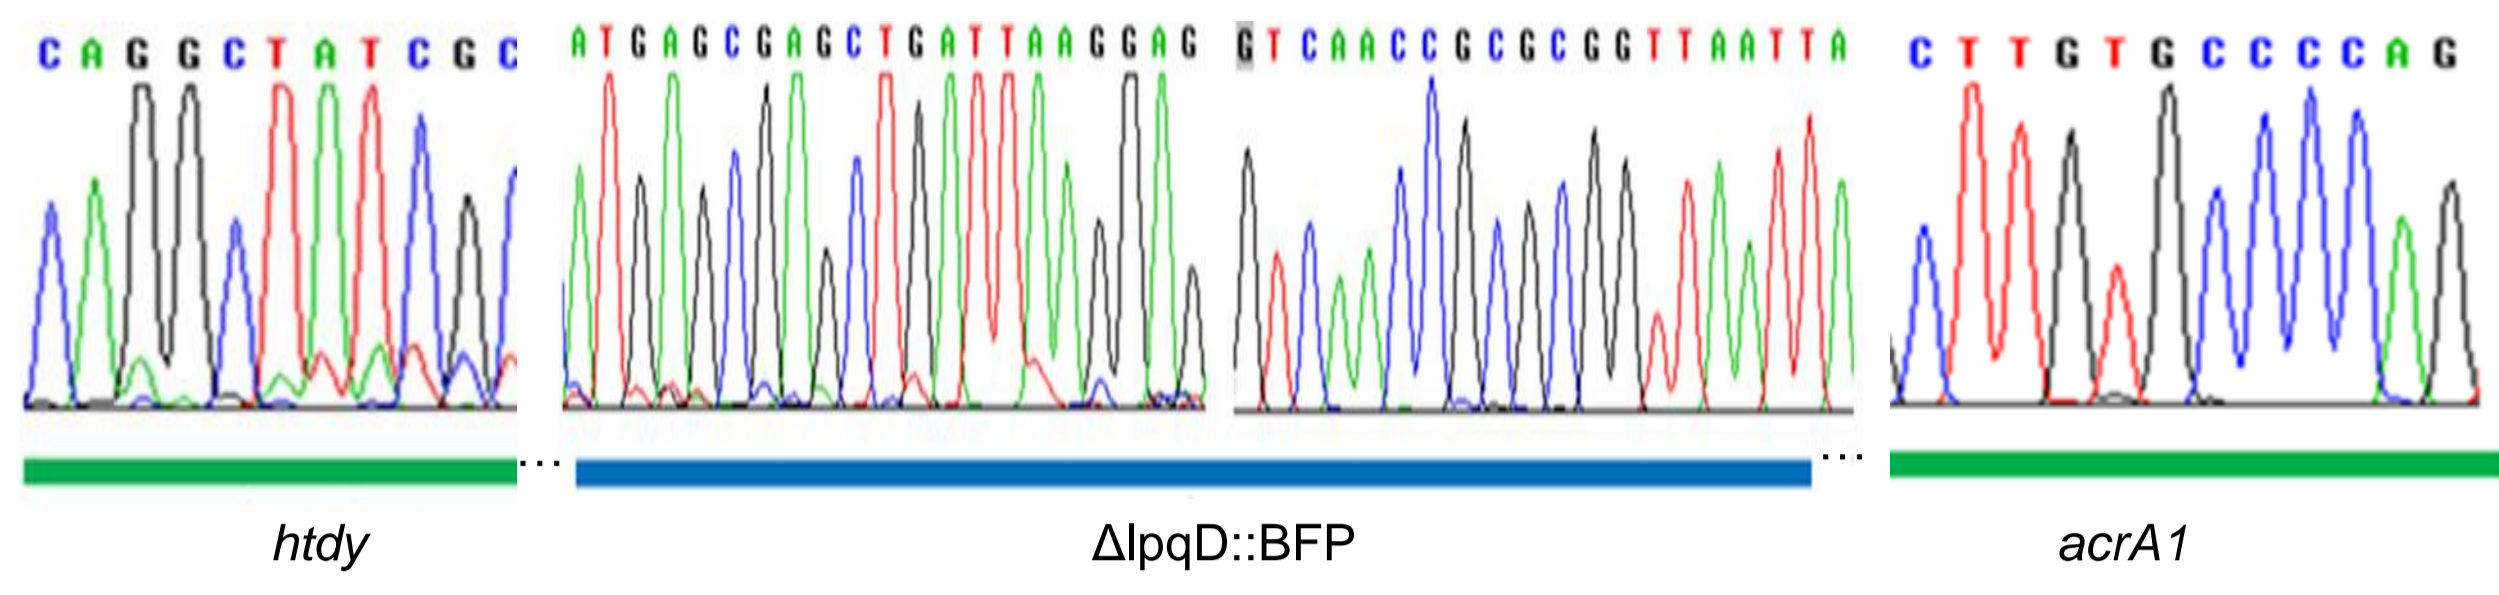

**B**

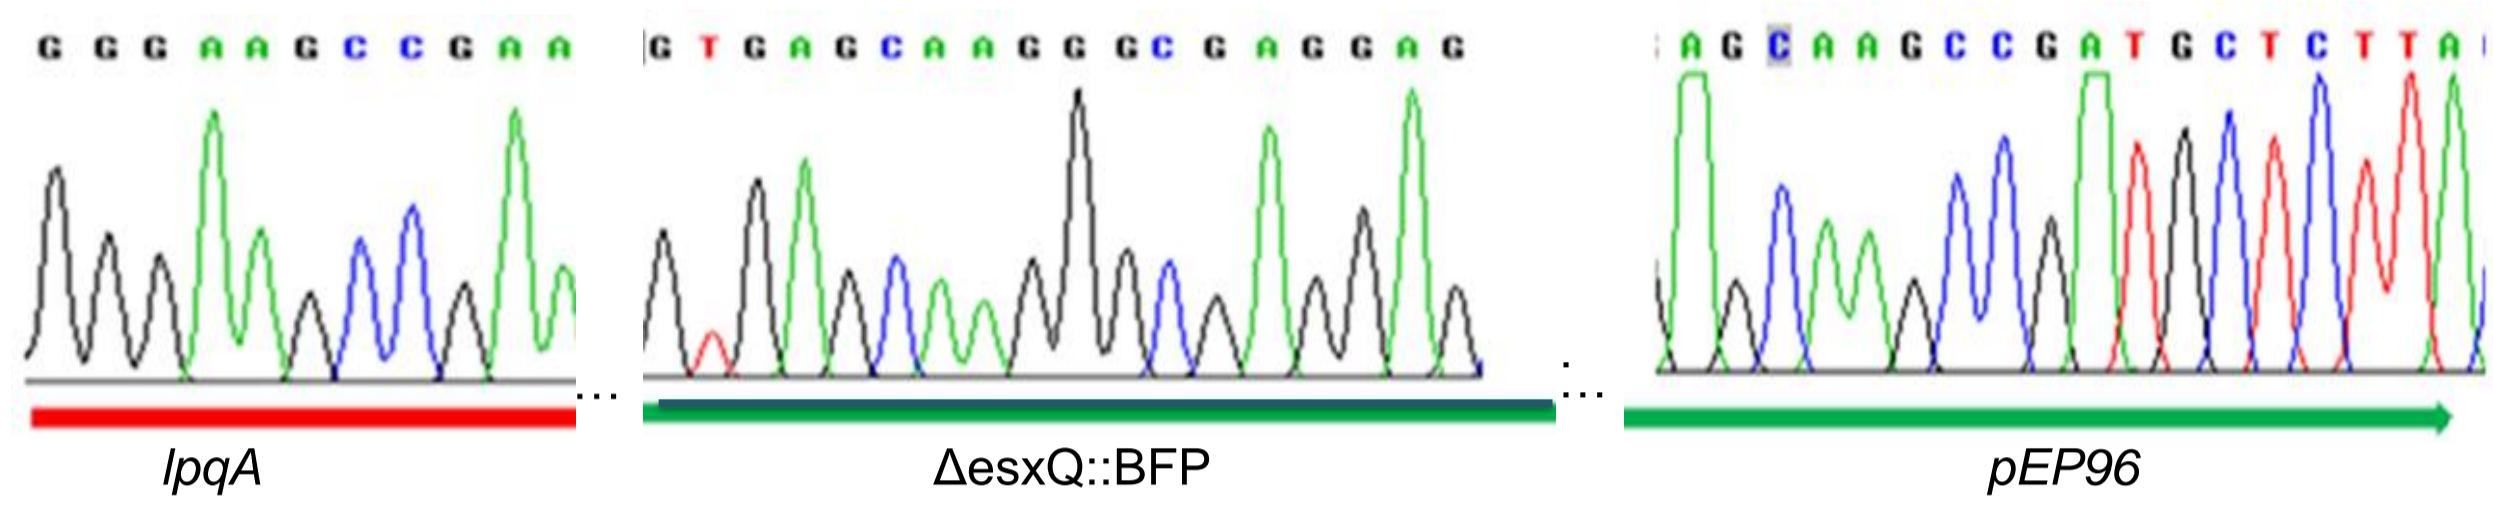

**C**

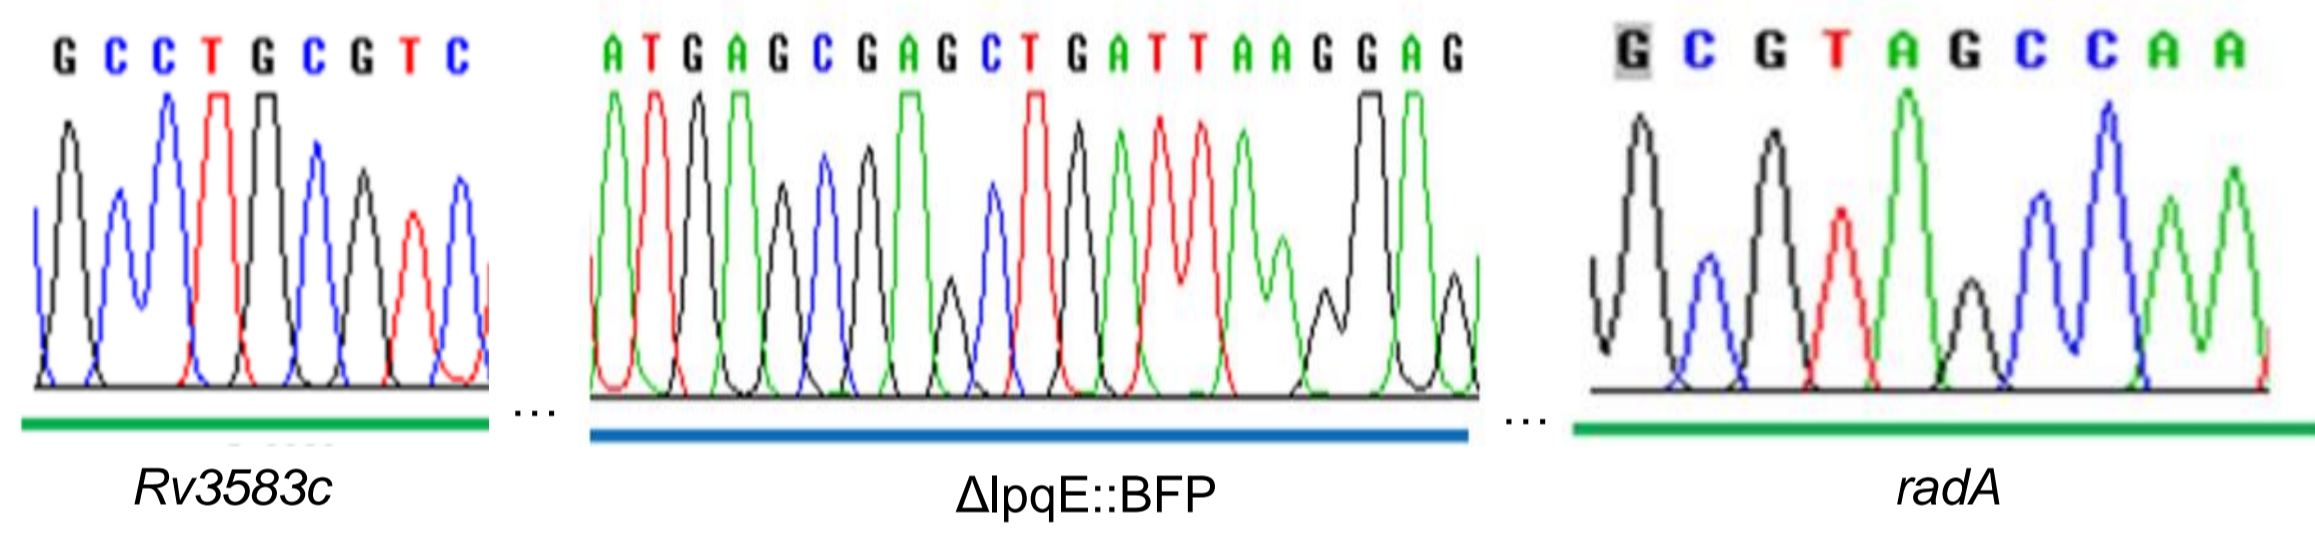

Supplement: mmc3.pdf [file mmc3.pdf]
