# Supplementary material for: Reprogramming Mycobacterium tuberculosis CRISPR System for Gene Editing and Genome-wide RNA Interference Screening
Source: PubMed Central journal article supplement (PMC10225669; doi:10.1016/j.gpb.2021.01.008), 2021-12-16

TCGCCGCCGAATCTAGAGTCGTCAGACCCAAAACCCCGAGAGGGGACGGAAACGGGTCTGCCCCCTATGCTTAA  
TACGAGAACCCCTGACCTGTCGTCAGACCCAAAACCCCGAGAGGGGACGGAAACAAGCTTCCAGGCATCAAATA

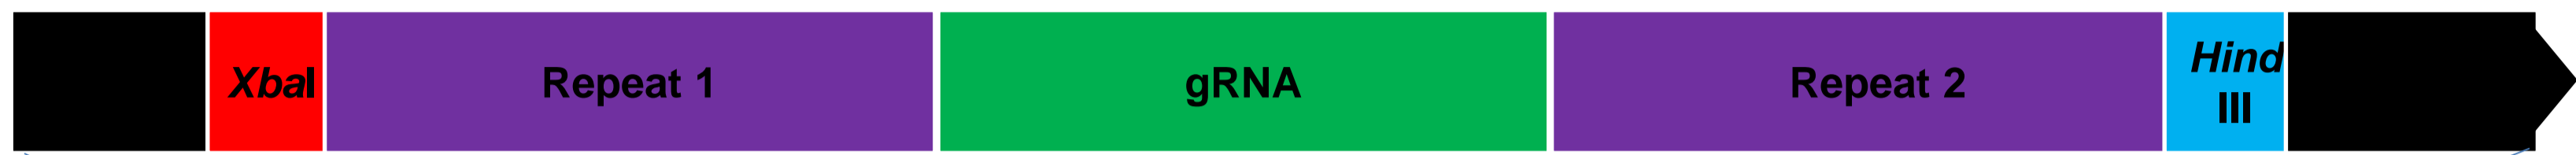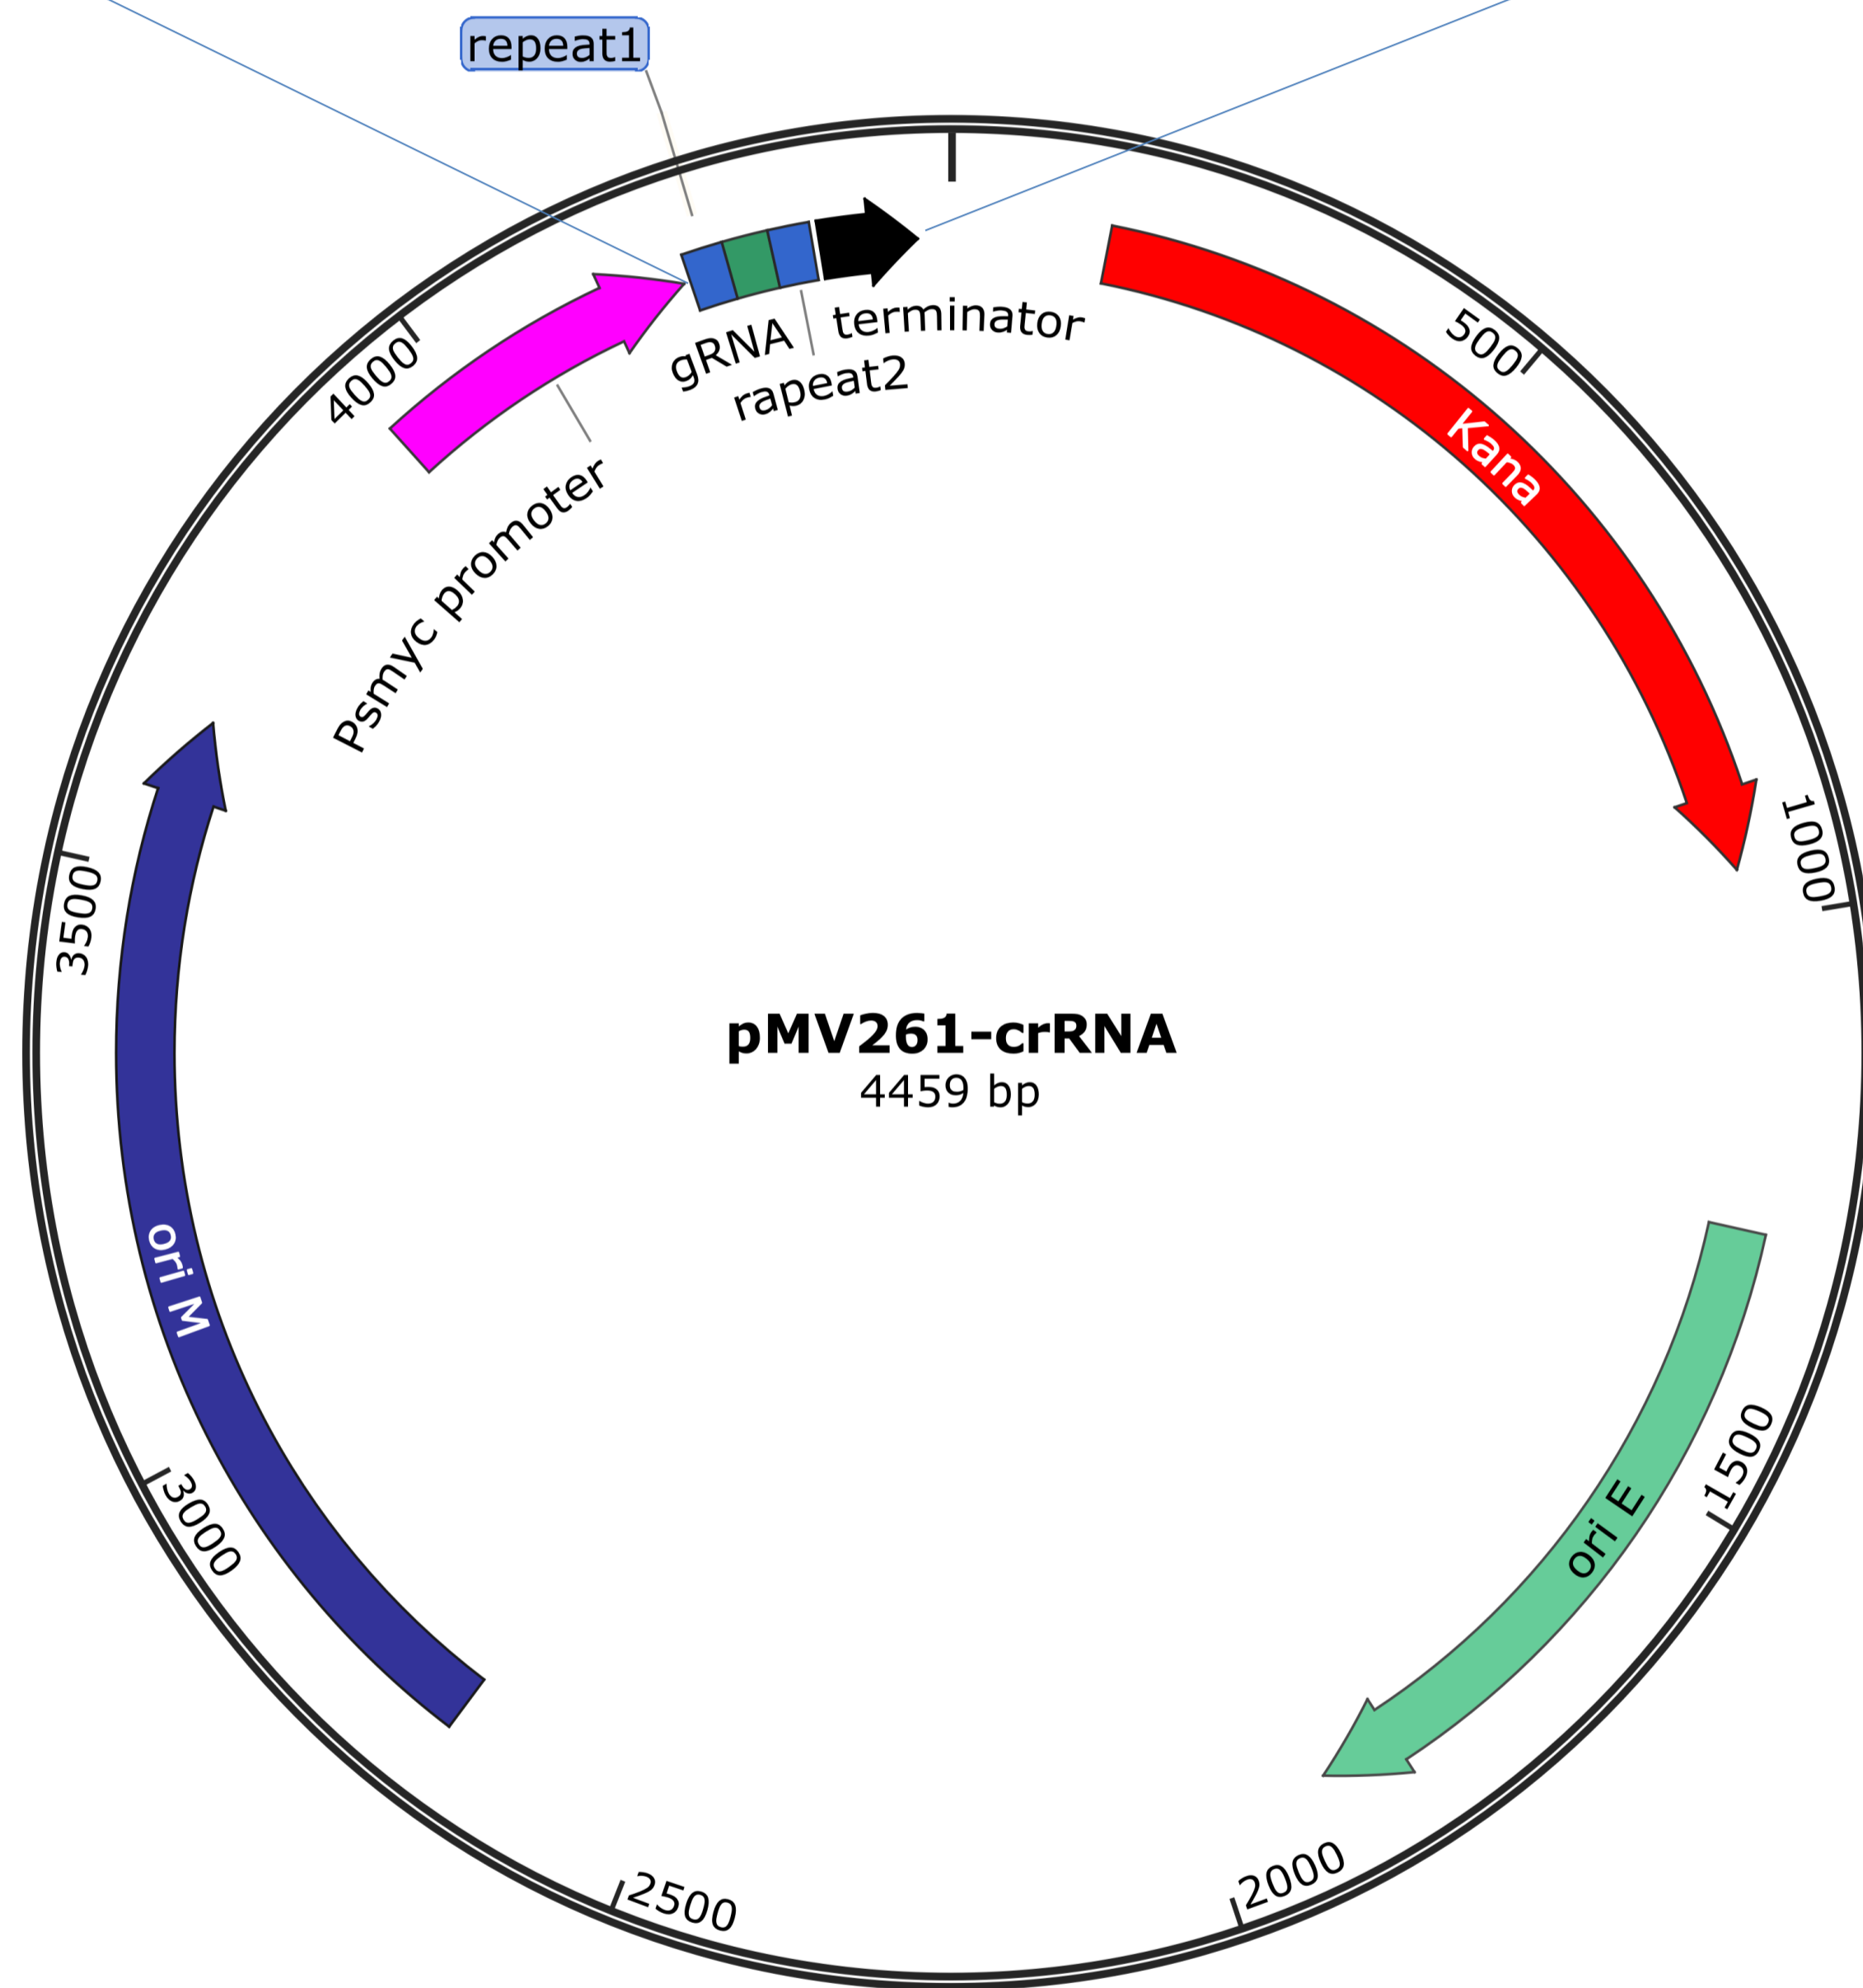

Supplement: mmc6.pdf [file mmc6.pdf]
